# Supplementary material for: Boron-doped silver nanosponges with enhanced performance towards electrocatalytic nitrogen reduction to ammonia
Source: Royal Society of Chemistry journal article supplement (doi:10.1039/c9cc07232b), 2019-01-01
Supplement: c9cc07232b1.pdf [file c9cc07232b1.pdf]

Electronic Supplementary Information for

**Boron-doped silver nanosponges with enhanced performance towards  
electrocatalytic nitrogen to ammonia**

Yinghao Li, Hongjie Yu, Ziqiang Wang,\* Songliang Liu, You Xu, Xiaonian Li, Liang Wang,\*

Hongjing Wang\*

State Key Laboratory Breeding Base of Green-Chemical Synthesis Technology, College of  
Chemical Engineering, Zhejiang University of Technology, Hangzhou 310014, P. R. China.

E-mails: zqwang@zjut.edu.cn; wangliang@zjut.edu.cn; hjw@zjut.edu.cn

## 1. Materials synthesis

**1.1 Materials and Chemicals.** Ammonium chloride ( $\text{NH}_4\text{Cl}$ , 99.999%) and sodium nitroferricyanide dihydrate ( $\text{C}_5\text{FeN}_6\text{Na}_2\text{O}\cdot 2\text{H}_2\text{O}$ ,  $\geq 99.0\%$ ) were purchased from MACKLIN. Silver nitrate ( $\text{AgNO}_3$ , 99.8%), salicylic acid ( $\text{C}_7\text{H}_6\text{O}_3$ , 99.5%), sodium borohydride ( $\text{NaBH}_4$ , 96%), para-(dimethylamino) benzaldehyde ( $\text{C}_9\text{H}_{11}\text{NO}$ , 99%), *N,N*-dimethylformamide (DMF, 99.5%), sodium hypochlorite solution ( $\text{NaClO}$ , available chlorine 6.0–14.0%), concentrated hydrochloric acid ( $\text{HCl}$ , 37 wt%), ethanol ( $\text{C}_2\text{H}_5\text{OH}$ ,  $\geq 99.8\%$ ), and hydrazine monohydrate ( $\text{N}_2\text{H}_4\cdot\text{H}_2\text{O}$ ,  $\geq 99\%$ ) were purchased from Aladdin. Nafion solution (5 wt%) was ordered from the Sigma-Aldrich. Carbon paper and Nafion 117 membranes were received from Shanghai Hesen Electric Co., Ltd.

**1.2 Synthesis of B-Ag NSs.** In a typical preparation of B-Ag NSs, 17 mg of  $\text{AgNO}_3$  was dissolved in 1 mL of DMF under ultrasonication. Then 5 mL of DMF containing 18.9 mg of  $\text{NaBH}_4$  was quickly injected into above solution, which was maintained in an ice bath for 2 h with vigorous stirring. Finally, the final product was collected by centrifugation and washed several times with ethanol and water.

## 2. Characterization

Scanning electron microscopy (SEM) images were obtained by a JSM-2010 scanning electron microscope. Transmission electron microscopy (TEM) and elemental analysis mapping were performed on a JEOL JEM-2100 equipped with an energy dispersive X-ray (EDX) spectroscopy. X-ray photoelectron spectroscopy (XPS) measurements were carried out using an ESCALAB MK II spectrometer. The X-ray diffraction (XRD) patterns were collected on an X-ray diffractometer (Shimadzu, XRD-6000) with  $\text{Cu K}\alpha$  radiation. The compositions of the catalysts were measured by inductively coupled plasma mass spectrometry (ICP-MS) (Elan DRC-e instrument).

## 3. Electrochemical measurements

All electrochemical measurements were performed in a two-compartment cell separated by a Nafion 117 membrane at ambient temperature. Three-electrode system was employed to estimate electrochemical performance by a CHI 660E apparatus, where modified carbon cloth, saturated

Ag/AgCl electrode and carbon rod were used as the working electrode, reference electrode and counter electrodes, respectively. For preparation of the working electrode, 5 mg of catalyst was mixed with 50  $\mu\text{L}$  of Nafion solution (5 wt%), 300  $\mu\text{L}$  of ultrapure water and 650  $\mu\text{L}$  of ethanol with sonication for 2 h. Then 20  $\mu\text{L}$  of electrocatalyst ink was loaded onto carbon paper ( $0.5 \times 0.5 \text{ cm}^2$ ) and dried under room temperature. Before  $\text{N}_2$  reduction experiments, the electrolyte (0.1 M HCl) was purged with  $\text{N}_2$  for 30 min. Linear sweep voltammetry (LSV) curves of catalysts were conducted in  $\text{N}_2$ - or Ar-saturated 0.1 M HCl solution. The chronoamperometry test was performed at different potentials in the  $\text{N}_2$ -saturated 0.1 M HCl solution with continual bubble of  $\text{N}_2$ . Potentials were recorded on the reversible hydrogen electrode, and current densities were normalized to geometric area of carbon cloth.

#### 4. Production Quantification

The concentration of produced  $\text{NH}_3$  was determined by the indophenol blue method.<sup>1</sup> In detail, 2 mL of electrolyte after electrolysis was mixed with 2 mL of 1.0 M NaOH solution containing  $\text{C}_7\text{H}_6\text{O}_3$  (5 wt%) and  $\text{C}_6\text{H}_5\text{Na}_3\text{O}_7$  (5 wt%), 1 mL of 0.05 M NaClO solution, and 0.2 mL of  $\text{C}_5\text{FeN}_6\text{Na}_2\text{O}$  solution (1 wt%). After standing at 25  $^\circ\text{C}$  for 2 h in the dark, the absorption spectrum was detected by an ultraviolet-visible (UV-vis) spectrophotometer. The known concentration  $\text{NH}_4^+$  solutions were used to calibrate the concentration-absorbance standard curve. On the other hand, the probable by-product hydrazine was estimated by the method of Watt and Chrisp.<sup>2</sup> Typically, the mixture solution containing 5.99 g of  $\text{C}_9\text{H}_{11}\text{NO}$ , 300 mL of ethanol and 30 mL of  $\text{HNO}_3$  was used as a color reagent. Then, 5 mL of electrolyte after electrolysis was added into 5 mL of color reagent. After standing for 10 min, the UV-vis absorption spectra were measured. The known concentration hydrazine monohydrate solutions were used to calibrate the concentration-absorbance standard curve. The rate of formation of  $\text{NH}_3$  ( $v_{\text{NH}_3}$ ) was calculated according to the following equation:

$$v_{\text{NH}_3} = (c_{\text{NH}_3} \times V) / t \times m \quad (1)$$

The FE was calculated based on the following equation:

$$\text{FE} = 3F \times c_{\text{NH}_3} \times V / (17 \times Q) \quad (2)$$

where  $c_{\text{NH}_3}$  is the concentration of  $\text{NH}_3$  in the electrolyte;  $V$  is the volume of electrolyte;  $t$  is the electrolysis time;  $m$  is the mass of catalysts;  $F$  is the Faraday constant; and  $Q$  is the total quantity of applied electricity.

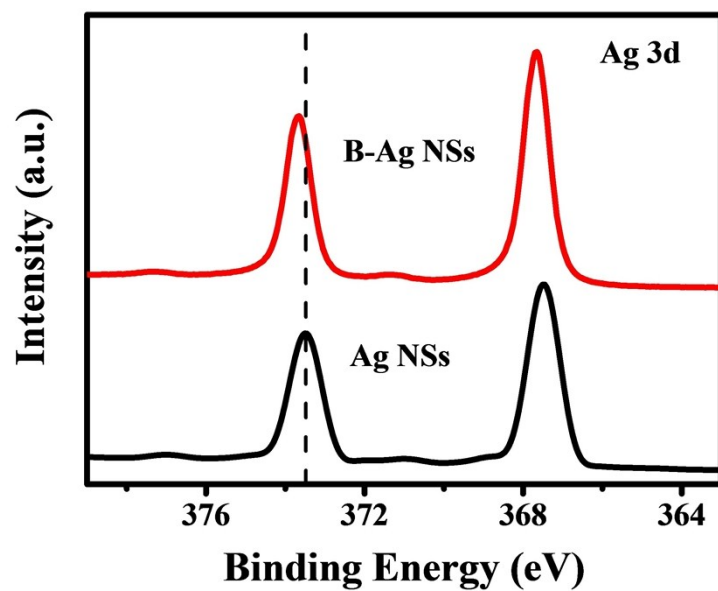

**Fig. S1** XPS Ag 3d spectra of the B-Ag NSs and Ag NSs.

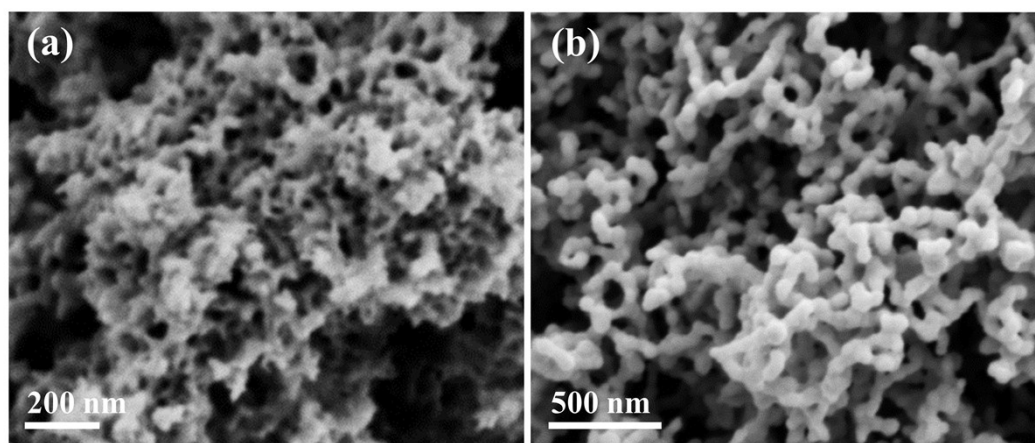

**Fig. S2** SEM images of the samples prepared with different solvents: (a) H<sub>2</sub>O and (b) DMF.

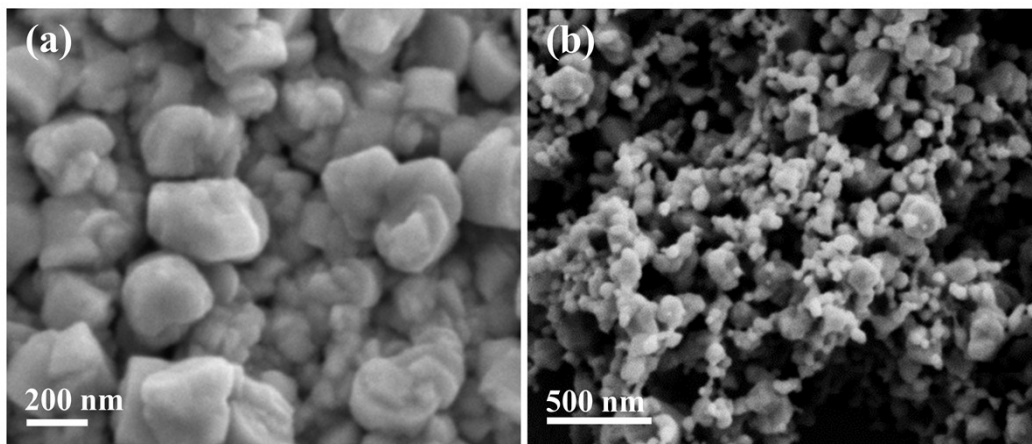

**Fig. S3** SEM images of the samples prepared with different concentrations of  $\text{NaBH}_4$ : (a) 20 mM and (b) 0.5 M.

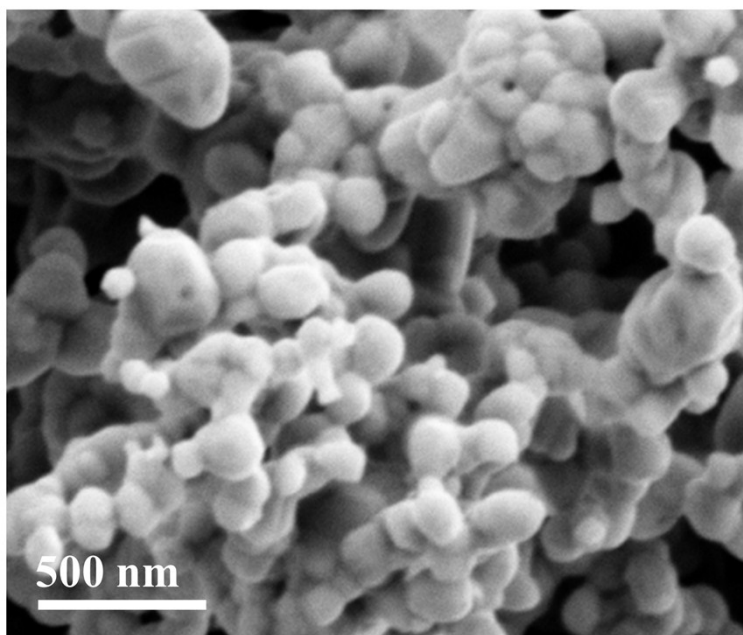

**Fig. S4** SEM image of the sample prepared at room temperature.

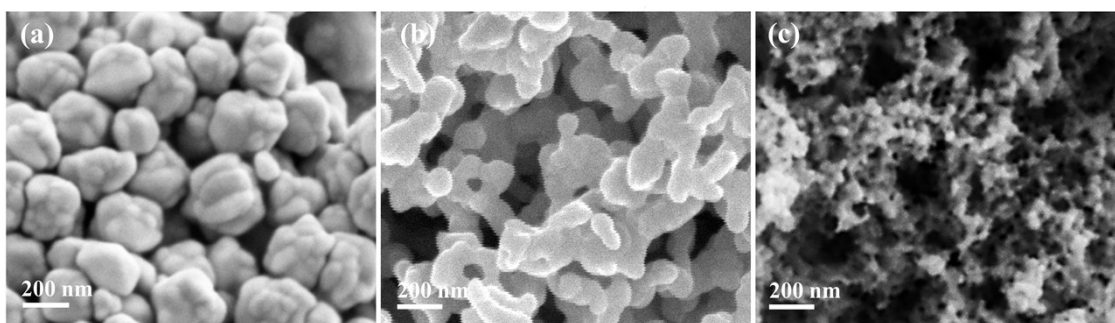

**Fig. S5** SEM images of the samples prepared with different amounts of reducing agent and metallic precursor: (a) NaBH<sub>4</sub> (1 mL, 0.1 M), AgNO<sub>3</sub> (1 mL, 0.1 M); (b) NaBH<sub>4</sub> (1 mL, 0.1 M), AgNO<sub>3</sub> (3 mL, 0.1 M); and (c) NaBH<sub>4</sub> (1 mL, 0.1 M), AgNO<sub>3</sub> (10 mL, 0.1 M).

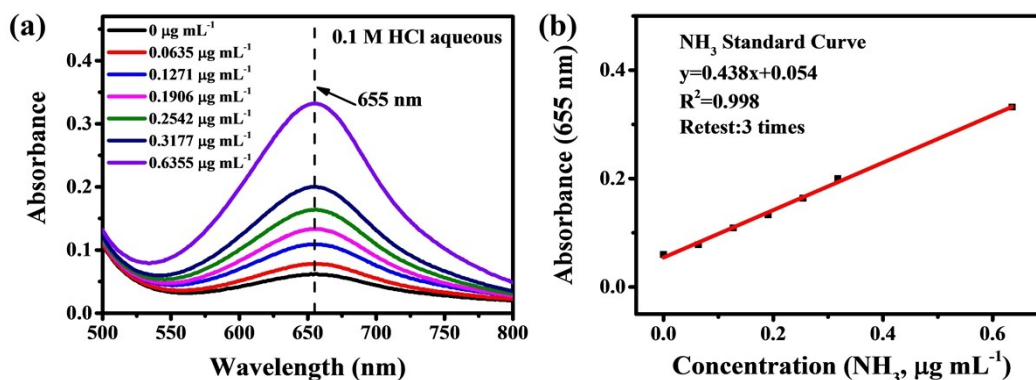

**Fig. S6** Absolute calibration of the indophenol blue method using ammonium chloride solutions of known concentrations as standards. (a) UV-vis absorption spectra of indophenol assays with NH<sub>4</sub><sup>+</sup> ions after incubation for 2 h at room temperature. (b) Calibration curve used for estimation of NH<sub>3</sub> by NH<sub>4</sub><sup>+</sup> concentrations. The absorbance at 655 nm was measured by UV-vis spectrophotometer, and the fitting curve shows good linear relation of absorbance with NH<sub>3</sub> concentrations.

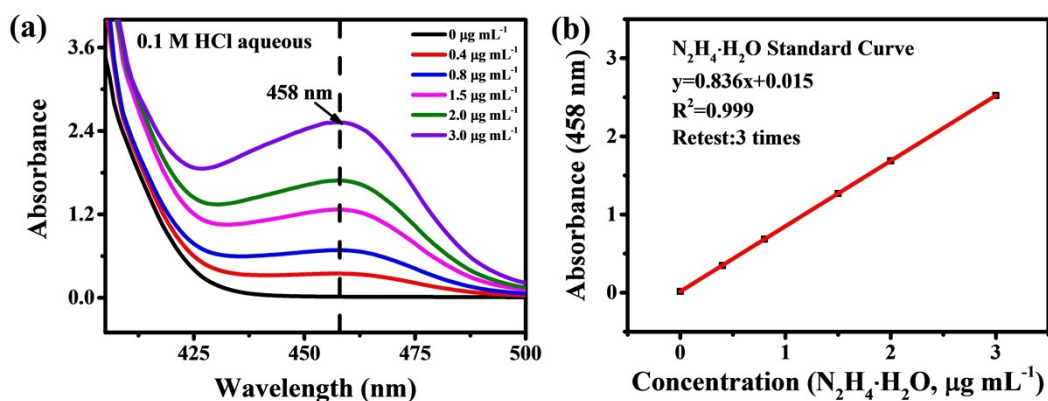

**Fig. S7** Absolute calibration of the Watt and Chrisp (para-dimethylaminobenzaldehyde) method for the estimating of  $\text{N}_2\text{H}_4 \cdot \text{H}_2\text{O}$  concentration using  $\text{N}_2\text{H}_4 \cdot \text{H}_2\text{O}$  solutions with known concentration as standards. (a) UV-Vis curves of various  $\text{N}_2\text{H}_4 \cdot \text{H}_2\text{O}$  concentration after incubated for 10 min at room temperature. (b) Calibration curve used for estimation of  $\text{N}_2\text{H}_4 \cdot \text{H}_2\text{O}$  concentration. The absorbance at 458 nm was measured by UV-Vis spectrophotometer, and the fitting curve shows good linear relation of absorbance with  $\text{N}_2\text{H}_4 \cdot \text{H}_2\text{O}$  concentration of three times independent calibration curves.

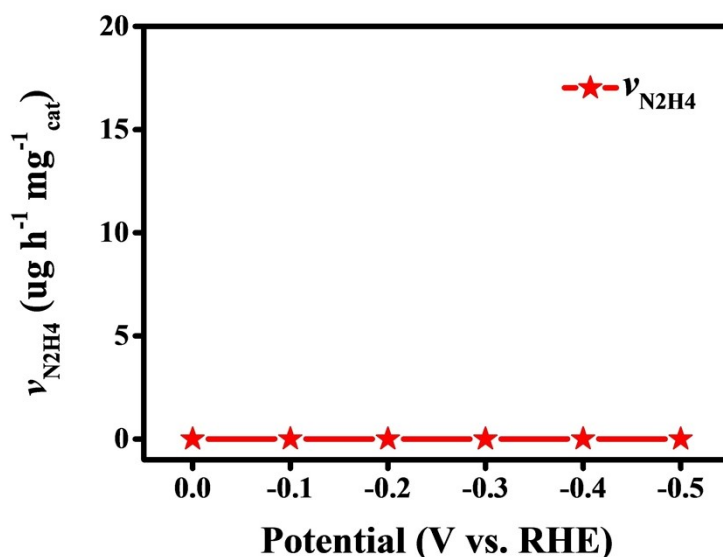

**Fig. S8** Yield rate of  $\text{N}_2\text{H}_4$  formation for the B-Ag NSs at selected potentials.



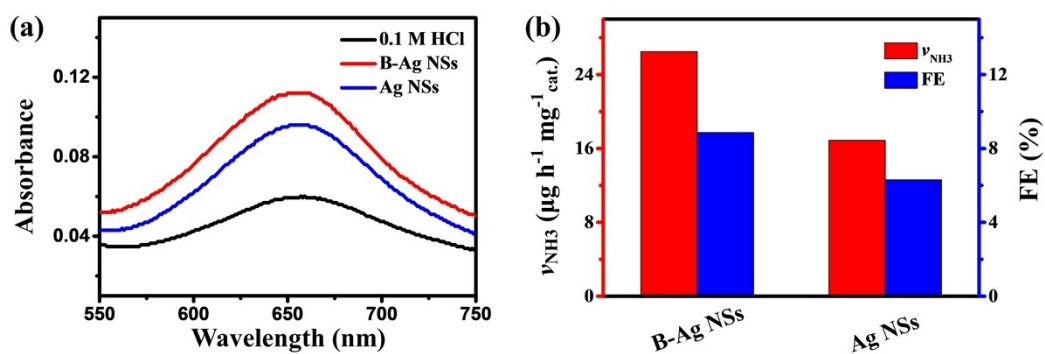

**Fig. S9** (a) UV-vis absorption spectra of the electrolyte catalysed by the B-Ag NSs and Ag NSs. (b) Yield rate of NH<sub>3</sub> and corresponding FE of the B-Ag NSs and Ag NSs.

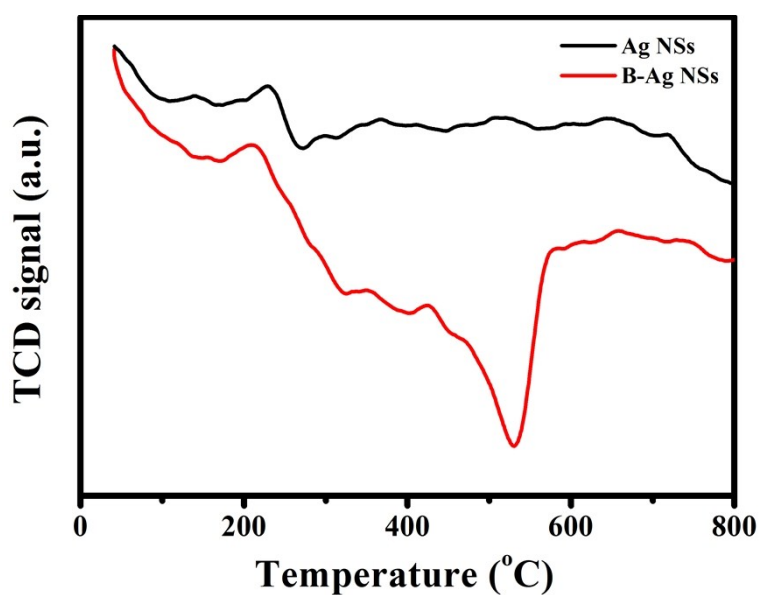

**Fig. S10** N<sub>2</sub>-TPD profiles of Ag NSs and B-Ag NSs.

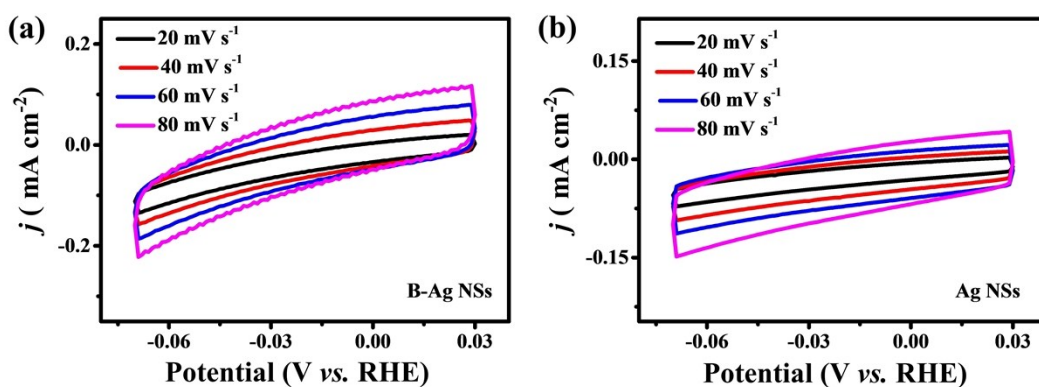

**Fig. S11** cyclic voltammetry curves of the (a) B-Ag NSs and (b) Ag NSs at different scan rates in the potential range of -0.07 and 0.03 V.

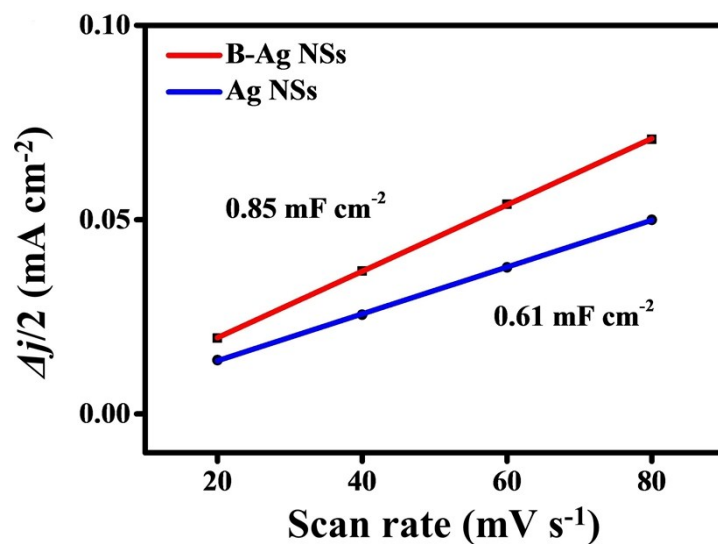

**Fig. S12** Charging current density differences plotted against scan rates for the B-Ag NSs and Ag NSs.

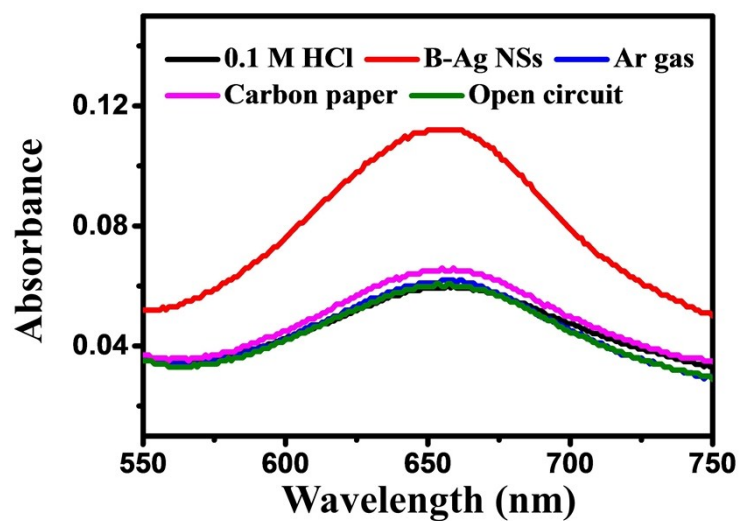

**Fig. S13** UV-vis absorption spectra of HCl electrolytes stained with indophenol indicator after charging at -0.2 V for 2 h under various conditions.

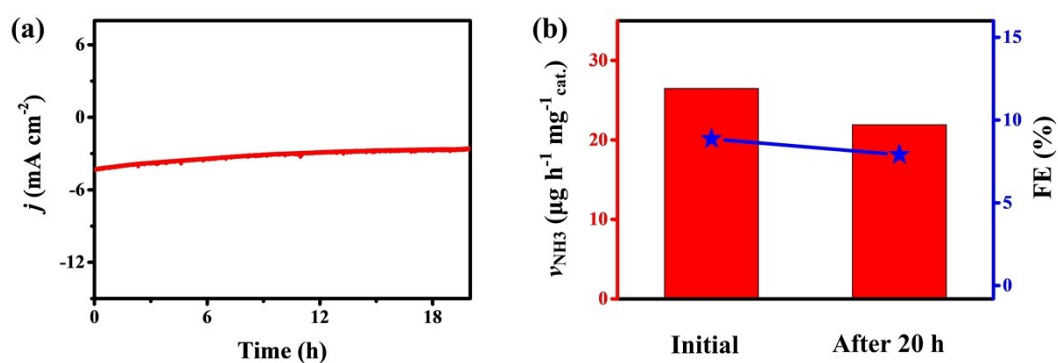

**Fig. S14** (a) Chronoamperometry curve of the B-Ag NSs at the potential of -0.5 V for 20 h. (b) Yield rate of  $\text{NH}_3$  and corresponding FE before and after the durability tests.

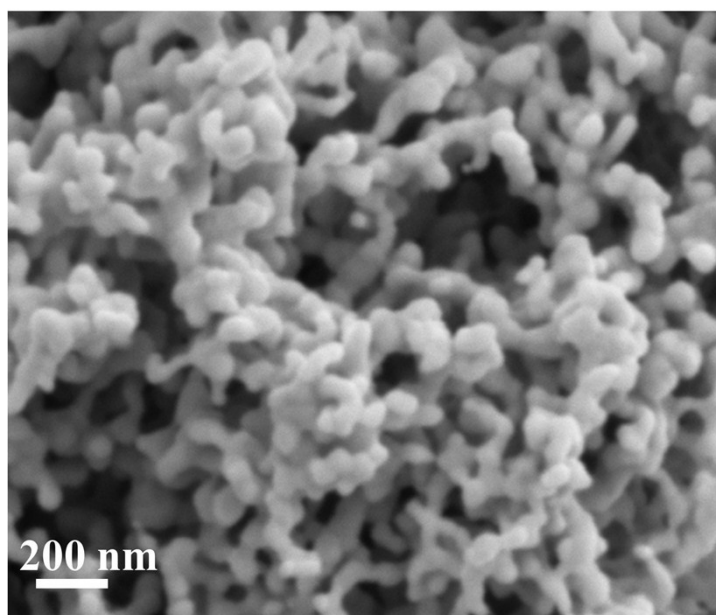

**Fig. S15** SEM image of the B-Ag NSs after long-term stability measurement.

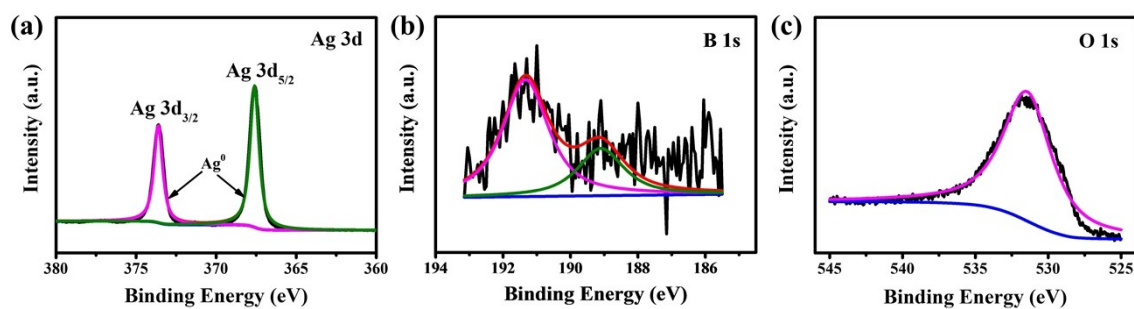

**Fig. S16** XPS spectra of the Ag 3d, B 1s and O 1s for the B-Ag NSs after stability test.

**Table S1.** The comparisons of the NRR activity of the B-Ag NSs with the recently reported catalysts under ambient conditions.

| Catalyst                            | Electrolyte                           | NH <sub>3</sub> yield rate                                               | FE(%)       | Ref.             |
|-------------------------------------|---------------------------------------|--------------------------------------------------------------------------|-------------|------------------|
| <b>B-Ag NSs</b>                     | <b>0.1 M HCl</b>                      | <b>26.48 <math>\mu\text{g h}^{-1} \text{mg}^{-1}_{\text{cat}}</math></b> | <b>8.86</b> | <b>This work</b> |
| Au-TiO <sub>2</sub> sub nanocluster | 0.1 M HCl                             | 21.4 $\mu\text{g h}^{-1} \text{mg}^{-1}_{\text{cat}}$                    | 8.11        | 3                |
| $\alpha$ -Au/CeO <sub>x</sub> -rGO  | 0.1 M HCl                             | 8.3 $\mu\text{g h}^{-1} \text{mg}^{-1}_{\text{cat}}$                     | 10.1        | 4                |
| VN nanosheet array                  | 0.1 M HCl                             | 5.6 $\mu\text{g h}^{-1} \text{mg}^{-1}_{\text{cat}}$                     | 2.25        | 5                |
| Pd/C                                | 0.1 M HCl                             | $\sim 2.5 \mu\text{g h}^{-1} \text{mg}^{-1}_{\text{cat}}$                | $\sim 1.0$  | 6                |
| Ag nanosheets                       | 0.1 M HCl                             | 2.83 $\mu\text{g h}^{-1} \text{mg}^{-1}_{\text{cat}}$                    | 4.8         | 7                |
| MoO <sub>3</sub>                    | 0.1 M HCl                             | 29.43 $\mu\text{g h}^{-1} \text{mg}^{-1}_{\text{cat}}$                   | 1.9         | 8                |
| PdRu BPNs                           | 0.1 M HCl                             | 25.92 $\mu\text{g h}^{-1} \text{mg}^{-1}_{\text{cat}}$                   | 1.53        | 9                |
| Au flower                           | 0.1 M HCl                             | 25.57 $\mu\text{g h}^{-1} \text{mg}^{-1}_{\text{cat}}$                   | 6.05        | 10               |
| N-Doped Porous Carbon               | 0.05 M H <sub>2</sub> SO <sub>4</sub> | 23.8 $\mu\text{g h}^{-1} \text{mg}^{-1}_{\text{cat}}$                    | 1.42        | 11               |
| Fe <sub>2</sub> O <sub>3</sub> -CNT | diluted KHCO <sub>3</sub>             | 0.22 $\mu\text{g h}^{-1} \text{cm}^{-2}$                                 | 0.15        | 12               |

## References

1. D. Bao, Q. Zhang, F. L. Meng, H. X. Zhong, M. M. Shi, Y. Zhang, J. M. Yan, Q. Jiang and X. B. Zhang, *Adv. Mater.*, 2017, **29**, 1604799.
2. C. Lv, Y. Qian, C. Yan, Y. Ding, Y. Liu, G. Chen and G. Yu, *Angew. Chem., Int. Ed.*, 2018, **57**, 10246-10250.
3. M. M. Shi, D. Bao, B. R. Wulan, Y. H. Li, Y. F. Zhang, J. M. Yan and Q. Jiang, *Adv. Mater.*, 2017, **29**, 1606550.
4. S.-J. Li, D. Bao, M.-M. Shi, B.-R. Wulan, J.-M. Yan and Q. Jiang, *Adv. Mater.*, 2017, **29**, 1700001.
5. R. Zhang, Y. Zhang, X. Ren, G. Cui, A. M. Asiri, B. Zheng and X. Sun, *ACS Sustainable Chem. Eng.*, 2018, **6**, 9545-9549.
6. J. Wang, L. Yu, L. Hu, G. Chen, H. Xin and X. Feng, *Nat. Commun.*, 2018, **9**, 1795.
7. H. Huang, L. Xia, X. Shi, A. M. Asiri and X. Sun, *Chem. Commun.*, 2018, **54**, 11427-11430.
8. J. Han, X. Ji, X. Ren, G. Cui, L. Li, F. Xie, H. Wang, B. Li and X. Sun, *J. Mater. Chem. A*, 2018, **6**, 12974-12977.
9. Z. Wang, C. Li, K. Deng, Y. Xu, H. Xue, X. Li, L. Wang and H. Wang, *ACS Sustainable Chem. Eng.*, 2018, **7**, 2400-2405.
10. Z. Wang, Y. Li, H. Yu, Y. Xu, H. Xue, X. Li, H. Wang and L. Wang, *ChemSusChem*, 2018, **11**, 3480-3485.
11. Y. Liu, Y. Su, X. Quan, X. Fan, S. Chen, H. Yu, H. Zhao, Y. Zhang and J. Zhao, *ACS Catal.*, 2018, **8**, 1186-1191.
12. S. Chen, S. Perathoner, C. Ampelli, C. Mebrahtu, D. Su and G. Centi, *Angew. Chem., Int. Ed.*, 2017, **56**, 2699-2703.
